# Supplementary material for: Tailored viscoelasticity of a polymer cellular structure through nanoscale entanglement of carbon nanotubes
Source: Royal Society of Chemistry journal article supplement (doi:10.1039/d0na00333f), 2020-01-01
Supplement: d0na00333f1.pdf [file d0na00333f1.pdf]

## Supporting information

### Tailored Viscoelasticity of Polymer Cellular Structure through Nanoscale Entanglement of Carbon Nanotube

Rituparna Ghosh and Abha Misra\*

Department of Instrumentation and Applied Physics, Indian Institute of Science, Bangalore,  
Karnataka, Indian 560012

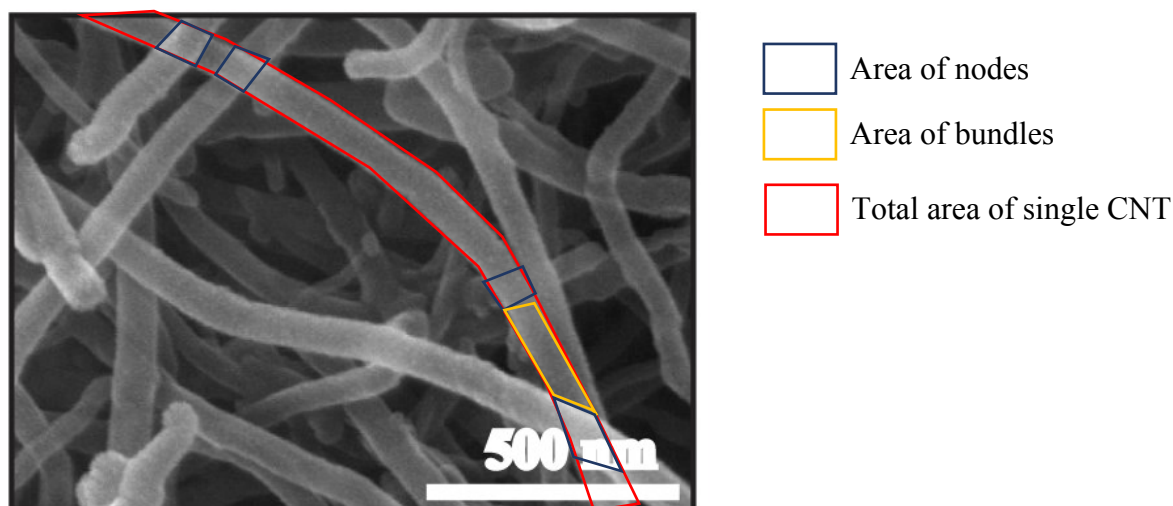

**Fig. S1:** Nodal, bundle and entanglement density calculation

Nodal density = (Total area of nodes connected to a single CNT/area of single CNT)

Bundle density = (Total area of bundles connected to a single CNT/area of single CNT)

Entanglement density = Nodal density + bundle density

---

\*Corresponding author. Tel.: +91-80-2293-3198. E-mail: [abha.misra1@gmail.com](mailto:abha.misra1@gmail.com) (Abha Misra)

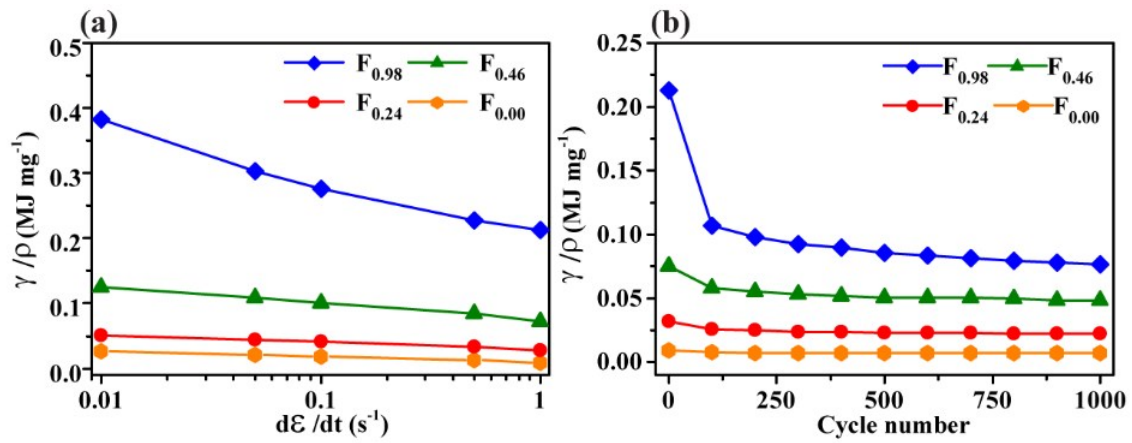

**Fig. S2:** (a) Strain dependency of energy loss and (b) cyclic energy loss.

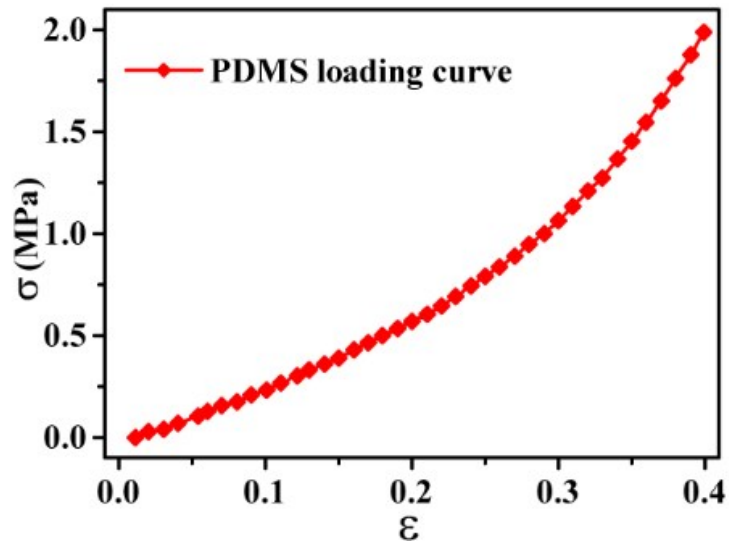

**Fig. S3:** Stress-strain plot of solid PDMS block for 40% compression.

From Ogden 1<sup>st</sup> order curve fitting  $\mu$  and  $\alpha$  were obtained 1.3 MPa and 9.22, respectively.
